# Supplementary material
Source: ML conference proceedings conference paper supplement (https://proceedings.mlr.press/v130/zhu21c.html)
Supplement: Supplementary file 1 [file zhu21c-supp.pdf]

## 7 Technical lemmas, propositions and proofs

**Lemma 4.** Suppose  $\mathbb{E}(\mathbf{v}^\top \mathbf{x}_i)^4 \leq R$  for any  $\mathbf{v} \in \mathcal{S}^{d-1}$ . Define the  $\ell_4$ -norm shrunk samples

$$\tilde{\mathbf{x}}_i := \frac{\min(\|\mathbf{x}_i\|_4, \tau)}{\|\mathbf{x}_i\|_4} \mathbf{x}_i,$$

where  $\tau$  is a threshold value. Then we have the following:

1.  $\|\tilde{\mathbf{x}}_i \tilde{\mathbf{x}}_i^\top - \mathbb{E} \tilde{\mathbf{x}}_i \tilde{\mathbf{x}}_i^\top\|_{\text{op}} \leq \|\tilde{\mathbf{x}}_i\|_2^2 + \sqrt{R} \leq \sqrt{d} \tau^2 + \sqrt{R}$ ;
2.  $\|\mathbb{E}((\tilde{\mathbf{x}}_i \tilde{\mathbf{x}}_i^\top - \mathbb{E} \tilde{\mathbf{x}}_i \tilde{\mathbf{x}}_i^\top)^\top (\tilde{\mathbf{x}}_i \tilde{\mathbf{x}}_i^\top - \mathbb{E} \tilde{\mathbf{x}}_i \tilde{\mathbf{x}}_i^\top))\|_{\text{op}} \leq R(d+1)$ ;
3. For all  $\xi > 0$ ,  $\mathbb{P}\{\|\tilde{\Sigma}_n(\tau) - \Sigma\|_{\text{op}} \geq \xi(\frac{Rd \log n}{n})^{1/2}\} \leq n^{1-C\xi}$ , where  $\tau \asymp (nR/(\log n))^{1/4}$  and  $C$  is a universal constant.

*Proof.* This result is from Fan et al. (2020+). For convenience of adapting the lemma to other settings, we present its proof here. Notice that

$$\|\tilde{\mathbf{x}}_i \tilde{\mathbf{x}}_i^\top - \mathbb{E} \tilde{\mathbf{x}}_i \tilde{\mathbf{x}}_i^\top\|_{\text{op}} \leq \|\tilde{\mathbf{x}}_i \tilde{\mathbf{x}}_i^\top\|_{\text{op}} + \|\mathbb{E} \tilde{\mathbf{x}}_i \tilde{\mathbf{x}}_i^\top\|_{\text{op}} = \|\tilde{\mathbf{x}}_i\|_2^2 + \sqrt{R} \leq \sqrt{d} \tau^2 + \sqrt{R}. \quad (14)$$

Also for any  $\mathbf{v} \in \mathcal{S}^{d-1}$ , we have

$$\begin{aligned} \mathbb{E}(\mathbf{v}^\top \tilde{\mathbf{x}}_i \tilde{\mathbf{x}}_i^\top \tilde{\mathbf{x}}_i \tilde{\mathbf{x}}_i^\top \mathbf{v}) &= \mathbb{E}(\|\tilde{\mathbf{x}}_i\|_2^2 (\mathbf{v}^\top \tilde{\mathbf{x}}_i)^2) \leq \mathbb{E}(\|\mathbf{x}_i\|_2^2 (\mathbf{v}^\top \mathbf{x}_i)^2) \\ &= \sum_{j=1}^d \mathbb{E}(x_{ij}^2 (\mathbf{v}^\top \mathbf{x}_i)^2) \leq \sum_{j=1}^d \sqrt{\mathbb{E}(x_{ij}^4) \mathbb{E}(\mathbf{v}^\top \mathbf{x}_i)^4} \leq Rd \end{aligned}$$

Then it follows that  $\|\mathbb{E} \tilde{\mathbf{x}}_i \tilde{\mathbf{x}}_i^\top \tilde{\mathbf{x}}_i \tilde{\mathbf{x}}_i^\top\|_{\text{op}} \leq Rd$ . Since  $\|(\mathbb{E} \tilde{\mathbf{x}}_i \tilde{\mathbf{x}}_i^\top)^\top \mathbb{E}(\tilde{\mathbf{x}}_i \tilde{\mathbf{x}}_i^\top)\|_{\text{op}} \leq R$ ,

$$\|\mathbb{E}((\tilde{\mathbf{x}}_i \tilde{\mathbf{x}}_i^\top - \mathbb{E} \tilde{\mathbf{x}}_i \tilde{\mathbf{x}}_i^\top)^\top (\tilde{\mathbf{x}}_i \tilde{\mathbf{x}}_i^\top - \mathbb{E} \tilde{\mathbf{x}}_i \tilde{\mathbf{x}}_i^\top))\|_{\text{op}} \leq R(d+1). \quad (15)$$

By the matrix Bernstein's inequality (Theorem 5.29 in Vershynin (2010)), we have for some constant  $c_1$ ,

$$\mathbb{P}\left(\left\|\frac{1}{n} \sum_{i=1}^n \tilde{\mathbf{x}}_i \tilde{\mathbf{x}}_i^\top - \mathbb{E} \tilde{\mathbf{x}}_i \tilde{\mathbf{x}}_i^\top\right\|_{\text{op}} > t\right) \leq 2d \exp\left(-c_1 \left(\frac{nt^2}{R(d+1)} \wedge \frac{nt}{\sqrt{d} \tau^2 + \sqrt{R}}\right)\right). \quad (16)$$

For any  $\mathbf{v} \in \mathcal{S}^{d-1}$ , it holds that

$$\mathbb{E}(\mathbf{v}^\top (\mathbf{x}_i \mathbf{x}_i^\top) \mathbf{v} 1_{\{\|\mathbf{x}_i\|_4 \geq \tau\}}) \leq \sqrt{\mathbb{E}(\mathbf{v}^\top \mathbf{x}_i)^4 P(\|\mathbf{x}_i\|_4 > \tau)} \leq \left(\frac{R^2 d}{\tau^4}\right)^{1/2} = \frac{R\sqrt{d}}{\tau^2}. \quad (17)$$

Therefore we have

$$\|\mathbb{E}(\mathbf{x}_i \mathbf{x}_i^\top - \tilde{\mathbf{x}}_i \tilde{\mathbf{x}}_i^\top)\|_{\text{op}} \leq R\sqrt{d}/\tau^2. \quad (18)$$

Choose  $\tau \asymp (nR/\log d)^{1/4}$  and substitute  $t$  with  $\xi \sqrt{Rd \log n/n}$ . Then we reach the final conclusion by combining the concentration bound and bias bound.  $\square$

*Proof of Lemma 1.* Define a contraction function

$$\phi(x; \theta) = x^2 1_{\{|x| \leq \theta\}} + (x - 2\theta)^2 1_{\{\theta < x \leq 2\theta\}} + (x + 2\theta)^2 1_{\{-2\theta \leq x < -\theta\}}.$$

One can verify that  $\phi(x; \theta) \leq x^2$  for any  $\theta$ . This contraction function was used in a preliminary version of Negahban et al. (2012) to establish the RSC of negative log-likelihood. Given any  $\Delta \in \mathcal{B}_2(\mathbf{0}, r)$ , by the Taylor

expansion, we can find  $v \in (0, 1)$  such that

$$\begin{aligned}
 \delta \tilde{\ell}_n(\boldsymbol{\beta}^* + \boldsymbol{\Delta}; \boldsymbol{\beta}^*) &= \tilde{\ell}_n(\boldsymbol{\beta}^* + \boldsymbol{\Delta}) - \tilde{\ell}_n(\boldsymbol{\beta}^*) - \nabla \tilde{\ell}_n(\boldsymbol{\beta}^*)^\top \boldsymbol{\Delta} = \frac{1}{2} \boldsymbol{\Delta}^\top \tilde{\mathbf{H}}_n(\boldsymbol{\beta}^* + v\boldsymbol{\Delta}) \boldsymbol{\Delta} \\
 &= \frac{1}{2n} \sum_{i=1}^n b''(\tilde{\mathbf{x}}_i^\top (\boldsymbol{\beta}^* + v\boldsymbol{\Delta})) (\boldsymbol{\Delta}^\top \tilde{\mathbf{x}}_i)^2 \geq \frac{1}{2n} \sum_{i=1}^n b''(\tilde{\mathbf{x}}_i^\top (\boldsymbol{\beta}^* + v\boldsymbol{\Delta})) \phi(\boldsymbol{\Delta}^\top \tilde{\mathbf{x}}_i; \alpha_1 r) \mathbf{1}_{\{|\boldsymbol{\beta}^{*\top} \tilde{\mathbf{x}}_i| \leq \alpha_2\}} \\
 &\geq \frac{m(\omega)}{2n} \sum_{i=1}^n \phi(\boldsymbol{\Delta}^\top \tilde{\mathbf{x}}_i; \alpha_1 r) \mathbf{1}_{\{|\boldsymbol{\beta}^{*\top} \tilde{\mathbf{x}}_i| \leq \alpha_2\}},
 \end{aligned} \tag{19}$$

where we choose  $\omega = \alpha_1 + \alpha_2 > \alpha_1 r + \alpha_2$  so that the last inequality holds by Condition (1). For ease of notation, let  $\mathcal{A}_i := \{|\boldsymbol{\Delta}^\top \tilde{\mathbf{x}}_i| \leq \alpha_1 r\}$  and  $\mathcal{B}_i := \{|\boldsymbol{\beta}^{*\top} \tilde{\mathbf{x}}_i| \leq \alpha_2\}$ . We have

$$\begin{aligned}
 \mathbb{E}[\phi(\boldsymbol{\Delta}^\top \tilde{\mathbf{x}}_i; \alpha_1 r) \mathbf{1}_{\mathcal{B}_i}] &\geq \mathbb{E}[(\boldsymbol{\Delta}^\top \tilde{\mathbf{x}}_i)^2 \mathbf{1}_{\mathcal{A}_i \cap \mathcal{B}_i}] \\
 &\geq \boldsymbol{\Delta}^\top \mathbb{E}[\mathbf{x}_i \mathbf{x}_i^\top \mathbf{1}_{\mathcal{A}_i \cap \mathcal{B}_i}] \boldsymbol{\Delta} - \boldsymbol{\Delta}^\top \mathbb{E}[(\mathbf{x}_i \mathbf{x}_i^\top - \tilde{\mathbf{x}}_i \tilde{\mathbf{x}}_i^\top) \mathbf{1}_{\mathcal{A}_i \cap \mathcal{B}_i}] \boldsymbol{\Delta} \\
 &\geq \boldsymbol{\Delta}^\top \mathbb{E}[\mathbf{x}_i \mathbf{x}_i^\top \mathbf{1}_{\mathcal{A}_i \cap \mathcal{B}_i}] \boldsymbol{\Delta} - \boldsymbol{\Delta}^\top \mathbb{E}[\mathbf{x}_i \mathbf{x}_i^\top - \tilde{\mathbf{x}}_i \tilde{\mathbf{x}}_i^\top] \boldsymbol{\Delta} \\
 &\geq \boldsymbol{\Delta}^\top \mathbb{E}(\mathbf{x}_i \mathbf{x}_i^\top) \boldsymbol{\Delta} - \boldsymbol{\Delta}^\top \mathbb{E}(\mathbf{x}_i \mathbf{x}_i^\top \mathbf{1}_{\mathcal{A}_i^c \cup \mathcal{B}_i^c}) \boldsymbol{\Delta} - \boldsymbol{\Delta}^\top \mathbb{E}[\mathbf{x}_i \mathbf{x}_i^\top - \tilde{\mathbf{x}}_i \tilde{\mathbf{x}}_i^\top] \boldsymbol{\Delta} \\
 &\geq \kappa_0 \|\boldsymbol{\Delta}\|_2^2 - \sqrt{\mathbb{E}(\boldsymbol{\Delta}^\top \mathbf{x}_i)^4 (\mathbb{P}(\mathcal{A}_i^c) + \mathbb{P}(\mathcal{B}_i^c))} - \boldsymbol{\Delta}^\top \mathbb{E}[\mathbf{x}_i \mathbf{x}_i^\top - \tilde{\mathbf{x}}_i \tilde{\mathbf{x}}_i^\top] \boldsymbol{\Delta}.
 \end{aligned}$$

By the Markov Inequality,

$$\mathbb{P}(\mathcal{A}_i^c) \leq \frac{\mathbb{E}(\boldsymbol{\Delta}^\top \tilde{\mathbf{x}}_i)^4}{\alpha_1^4 r^4} \leq \frac{R}{\alpha_1^4} \quad \text{and} \quad \mathbb{P}(\mathcal{B}_i^c) \leq \frac{\mathbb{E}(\boldsymbol{\beta}^{*\top} \tilde{\mathbf{x}}_i)^4}{\alpha_2^4} \leq \frac{R \|\boldsymbol{\beta}^*\|_2^4}{\alpha_2^4} \leq \frac{RL^4}{\alpha_2^4}.$$

Besides, according to (18),

$$\boldsymbol{\Delta}^\top \mathbb{E}[\mathbf{x}_i \mathbf{x}_i^\top - \tilde{\mathbf{x}}_i \tilde{\mathbf{x}}_i^\top] \boldsymbol{\Delta} \leq \frac{R\sqrt{d} \|\boldsymbol{\Delta}\|_2^2}{\tau_1^2} \leq C_1 R \|\boldsymbol{\Delta}\|_2^2 \left( \frac{d \log d}{n} \right)^{1/2},$$

where  $C_1$  is certain constant. Therefore, for sufficiently large  $\alpha_1, \alpha_2, n$  and  $d$ ,

$$\mathbb{E}[\phi(\boldsymbol{\Delta}^\top \tilde{\mathbf{x}}_i; \alpha_1 r) \mathbf{1}_{\mathcal{B}_i}] \geq \frac{\kappa_0}{2} \|\boldsymbol{\Delta}\|_2^2. \tag{20}$$

For notational convenience, define  $Z_i := \phi(\boldsymbol{\Delta}^\top \tilde{\mathbf{x}}_i; \alpha_1 r) \mathbf{1}_{\mathcal{B}_i} = \phi(\boldsymbol{\Delta}^\top \tilde{\mathbf{x}}_i \mathbf{1}_{\mathcal{B}_i}; \alpha_1 r)$  and  $\Gamma_r := \sup_{\|\boldsymbol{\Delta}\|_2 \leq r} |n^{-1} \sum_{i=1}^n Z_i - \mathbb{E}Z_i|$ . Then an application of Massart's inequality (Massart (2000)) delivers that

$$\mathbb{P}\left\{ |\Gamma_r - \mathbb{E}\Gamma_r| \geq \alpha_1^2 r^2 \left( \frac{t}{n} \right)^{1/2} \right\} \leq 2 \exp\left(-\frac{t}{8}\right). \tag{21}$$

The remaining job is to derive the order of  $\mathbb{E}\Gamma_r$ . Note that  $|\phi(x_1; \theta) - \phi(x_2; \theta)| \leq 2\theta|x_1 - x_2|$  for any  $x_1, x_2 \in \mathbb{R}$ . By the symmetrization argument and then Ledoux-Talagrand contraction inequality (see Ledoux and Talagrand (2013), p. 112), for a sequence of i.i.d. Rademacher variables  $\{\gamma_i\}_{i=1}^n$ ,

$$\begin{aligned}
 \mathbb{E}\Gamma_r &\leq 2\mathbb{E} \sup_{\|\boldsymbol{\Delta}\|_2 \leq r} \left| \frac{1}{n} \sum_{i=1}^n \gamma_i Z_i \right| \leq 8\alpha_1 r \mathbb{E} \sup_{\|\boldsymbol{\Delta}\|_2 \leq r} \left| \left\langle \frac{1}{n} \sum_{i=1}^n \gamma_i \tilde{\mathbf{x}}_i \mathbf{1}_{\{|\boldsymbol{\beta}^{*\top} \tilde{\mathbf{x}}_i| \leq \alpha_2\}}, \boldsymbol{\Delta} \right\rangle \right| \\
 &\leq 8\alpha_1 r^2 \mathbb{E} \left\| \frac{1}{n} \sum_{i=1}^n \gamma_i \tilde{\mathbf{x}}_i \mathbf{1}_{\{|\boldsymbol{\beta}^{*\top} \tilde{\mathbf{x}}_i| \leq \alpha_2\}} \right\|_2 \leq 8\alpha_1 r^2 \left( \mathbb{E} \left\| \frac{1}{n} \sum_{i=1}^n \gamma_i \tilde{\mathbf{x}}_i \mathbf{1}_{\{|\boldsymbol{\beta}^{*\top} \tilde{\mathbf{x}}_i| \leq \alpha_2\}} \right\|_2^2 \right)^{1/2} \\
 &\leq 8\alpha_1 r^2 \left( \frac{1}{n^2} \sum_{i=1}^n \mathbb{E} \|\tilde{\mathbf{x}}_i\|_2^2 \right)^{1/2} \leq 8\alpha_1 r^2 R^{1/4} \left( \frac{d}{n} \right)^{1/2}.
 \end{aligned}$$

Combining the above inequality with (19), (20) and (21) yields that for any  $t > 0$ , with probability at least  $1 - 2 \exp(-t)$ , for all  $\boldsymbol{\Delta} \in \mathbb{R}^d$  such that  $\|\boldsymbol{\Delta}\|_2 \leq r$ ,

$$\delta \tilde{\ell}_n(\boldsymbol{\beta}; \boldsymbol{\beta}^*) \geq \frac{m\kappa_0}{4} \|\boldsymbol{\Delta}\|_2^2 - \alpha_1^2 \left( \frac{8t}{n} \right)^{1/2} r^2 - 8\alpha_1 R^{1/4} \left( \frac{d}{n} \right)^{1/2} r^2.$$

□

*Proof of Theorem 1.* Construct an intermediate estimator  $\tilde{\beta}_\eta$  between  $\tilde{\beta}$  and  $\beta^*$ :

$$\tilde{\beta}_\eta = \beta^* + \eta(\tilde{\beta} - \beta^*),$$

where  $\eta = 1$  if  $\|\tilde{\beta} - \beta^*\|_2 \leq r$  and  $\eta = r/\|\tilde{\beta} - \beta^*\|_2$  if  $\|\tilde{\beta} - \beta^*\|_2 > r$ . Write  $\tilde{\beta}_\eta - \beta^*$  as  $\tilde{\Delta}_\eta$ . By Lemma 1, it holds with probability at least  $1 - 2\exp(-t)$  that

$$\kappa\|\tilde{\Delta}_\eta\|_2^2 - Cr^2\left\{\left(\frac{t}{n}\right)^{1/2} + \left(\frac{d}{n}\right)^{1/2}\right\} \leq \delta\tilde{\ell}_n(\tilde{\beta}_\eta; \beta^*) \leq -\nabla\tilde{\ell}_n(\beta^*)^\top \tilde{\Delta}_\eta \leq \|\nabla\tilde{\ell}_n(\beta^*)\|_2\|\tilde{\Delta}_\eta\|_2,$$

which further implies that

$$\|\tilde{\Delta}_\eta\|_2 \leq \frac{3\|\nabla\tilde{\ell}_n(\beta^*)\|_2}{\kappa} + \left(\frac{3c_1r^2}{\kappa}\right)^{1/2}\left(\frac{t}{n}\right)^{1/4} + \left(\frac{3c_2r^2}{\kappa}\right)^{1/2}\left(\frac{d}{n}\right)^{1/4}. \quad (22)$$

Now we derive the rate of  $\|\nabla\tilde{\ell}_n(\beta^*)\|_2$ .

$$\begin{aligned} \nabla\tilde{\ell}_n(\beta^*) &= \frac{1}{n} \sum_{i=1}^n (\tilde{z}_i - b'(\tilde{\mathbf{x}}_i^\top \beta^*)) \tilde{\mathbf{x}}_i \\ &= \frac{1}{n} \underbrace{\sum_{i=1}^n \tilde{z}_i \tilde{\mathbf{x}}_i - \mathbb{E}\tilde{z}_i \tilde{\mathbf{x}}_i}_{T_1} + \underbrace{\mathbb{E}(\tilde{z}_i - b'(\tilde{\mathbf{x}}_i^\top \beta^*)) \tilde{\mathbf{x}}_i}_{T_2} + \frac{1}{n} \underbrace{\sum_{i=1}^n b'(\tilde{\mathbf{x}}_i^\top \beta^*) \tilde{\mathbf{x}}_i - \mathbb{E}(b'(\tilde{\mathbf{x}}_i^\top \beta^*) \tilde{\mathbf{x}}_i)}_{T_3}. \end{aligned} \quad (23)$$

where  $\bar{\mathbf{x}}_i$  is between  $\mathbf{x}_i$  and  $\tilde{\mathbf{x}}_i$  by the mean value theorem. In the following we will bound  $T_1, T_2$  and  $T_3$  respectively.

Bound for  $T_1$ : Define the Hermitian dilation matrix

$$\tilde{\mathbf{Z}}_i := \tilde{z}_i \begin{pmatrix} 0 & \tilde{\mathbf{x}}_i^\top \\ \tilde{\mathbf{x}}_i & \mathbf{0} \end{pmatrix}$$

Note that

$$\|\mathbb{E}\tilde{\mathbf{Z}}_i^2\|_{\text{op}} = \|\mathbb{E}\left[\tilde{z}_i^2 \begin{pmatrix} \tilde{\mathbf{x}}_i^\top \tilde{\mathbf{x}}_i & \mathbf{0}^\top \\ \mathbf{0} & \tilde{\mathbf{x}}_i \tilde{\mathbf{x}}_i^\top \end{pmatrix}\right]\|_{\text{op}} = \max(\mathbb{E}(\tilde{z}_i^2 \tilde{\mathbf{x}}_i^\top \tilde{\mathbf{x}}_i), \|\mathbb{E}(\tilde{z}_i^2 \tilde{\mathbf{x}}_i \tilde{\mathbf{x}}_i^\top)\|_{\text{op}})$$

For any  $j \in [d]$ ,

$$\mathbb{E}(\tilde{z}_i^2 \tilde{x}_{ij}^2) \leq \sqrt{\mathbb{E}z_i^4 \mathbb{E}x_{ij}^4} \leq \sqrt{M_1 R},$$

so  $\mathbb{E}[\tilde{z}_i^2 \tilde{\mathbf{x}}_i^\top \tilde{\mathbf{x}}_i] \leq d\sqrt{M_1 R}$ . In addition, for any  $\mathbf{v} \in \mathbb{R}^d$  such that  $\|\mathbf{v}\|_2 = 1$ ,

$$\mathbb{E}(\tilde{z}_i^2 (\mathbf{v}^\top \tilde{\mathbf{x}}_i)^2) \leq \sqrt{M_1 R}.$$

We thus have  $\|\mathbb{E}\tilde{\mathbf{Z}}_i^2\|_{\text{op}} \leq d\sqrt{M_1 R}$ . In addition,  $\|\mathbb{E}\tilde{\mathbf{Z}}_i\|_{\text{op}} = \mathbb{E}(\tilde{z}_i \|\tilde{\mathbf{x}}_i\|_2) \leq \sqrt{\mathbb{E}z_i^2 \mathbb{E}\|\mathbf{x}_i\|_2^2} \leq \sqrt{d}(M_1 R)^{1/4}$ , which further implies that  $\|\mathbb{E}(\tilde{\mathbf{Z}}_i - \mathbb{E}\tilde{\mathbf{Z}}_i)^2\|_{\text{op}} \leq 2d\sqrt{M_1 R}$ . Also notice that since  $\|\tilde{\mathbf{x}}_i\|_4 \leq \tau_1$  and  $\tilde{z}_i \leq \tau_2$ ,  $\|\tilde{\mathbf{Z}}_i\|_{\text{op}} \leq \frac{1}{2}d^{1/4}\tau_1\tau_2$ . By the matrix Bernstein's inequality,

$$P\left(\left\|\frac{1}{n} \sum_{i=1}^n \tilde{\mathbf{Z}}_i - \mathbb{E}\tilde{\mathbf{Z}}_i\right\|_{\text{op}} \geq t\right) \leq d \exp\left\{-c_1 \min\left(\frac{nt^2}{2d\sqrt{M_1 R}}, \frac{2nt}{d^{1/4}\tau_1\tau_2}\right)\right\}.$$

Given that  $\|T_1\|_2 = 2\|n^{-1} \sum_{i=1}^n \tilde{\mathbf{Z}}_i - \mathbb{E}\tilde{\mathbf{Z}}_i\|_{\text{op}}$ , it thus holds that

$$\mathbb{P}\left(\|T_1\|_2 \geq 2t\right) \leq d \exp\left\{-c_1 \min\left(\frac{nt^2}{2d\sqrt{M_1 R}}, \frac{2nt}{d^{1/4}\tau_1\tau_2}\right)\right\}. \quad (24)$$

Bound for  $T_2$ : We decompose  $T_2$  as follows:

$$\begin{aligned} \|T_2\|_2 \leq & \underbrace{\|\mathbb{E}(\tilde{z}_i - z_i)\tilde{\mathbf{x}}_i\|_2}_{T_{21}} + \underbrace{\|\mathbb{E}(z_i - y_i)\tilde{\mathbf{x}}_i\|_2}_{T_{22}} + \underbrace{\|\mathbb{E}(y_i - b'(\mathbf{x}_i^\top \boldsymbol{\beta}^*))\tilde{\mathbf{x}}_i\|_2}_{T_{23}} \\ & + \underbrace{\|\mathbb{E}(b'(\mathbf{x}_i^\top \boldsymbol{\beta}^*) - b'(\tilde{\mathbf{x}}_i^\top \boldsymbol{\beta}^*))\tilde{\mathbf{x}}_i\|_2}_{T_{24}}. \end{aligned}$$

Now we work on  $\{T_{2i}\}_{i=1}^4$  one by one. For any  $\mathbf{v} \in \mathbb{R}^d$  such that  $\|\mathbf{v}\|_2 = 1$ ,

$$\begin{aligned} |\mathbb{E}(\tilde{z}_i - z_i)(\mathbf{v}^\top \tilde{\mathbf{x}}_i)| & \leq \mathbb{E}(|z_i|(\mathbf{v}^\top \mathbf{x}_i)1_{\{|z_i| > \tau_2\}}) \leq \sqrt{\mathbb{E}(z_i^2(\mathbf{v}^\top \mathbf{x}_i)^2)\mathbb{P}(|z_i| > \tau_2)} \\ & \leq (M_1 R)^{1/4} \frac{\sqrt{M_1}}{\tau_2^2}, \end{aligned}$$

thus we have  $\|T_{21}\|_2 \leq M_1^{3/4} R^{1/4} / \tau_2^2$ . Again, for any  $\mathbf{v} \in \mathbb{R}^d$  such that  $\|\mathbf{v}\|_2 = 1$ , since  $\|\mathbb{E}\epsilon_i \mathbf{x}_i\|_2 \leq M_2 \sqrt{d/n}$ ,

$$\begin{aligned} \mathbb{E}[\epsilon_i(\tilde{\mathbf{x}}_i^\top \mathbf{v})] & = \mathbb{E}[\epsilon_i((\tilde{\mathbf{x}}_i - \mathbf{x}_i)^\top \mathbf{v})] + \mathbb{E}[\epsilon_i(\mathbf{x}_i^\top \mathbf{v})] \leq \mathbb{E}[\epsilon_i|\mathbf{x}_i^\top \mathbf{v}|1_{\{\|\mathbf{x}_i\|_4 \geq \tau_1\}}] + M_2 \left(\frac{d}{n}\right)^{1/2} \\ & \leq \sqrt{\mathbb{E}(\epsilon_i(\mathbf{x}_i^\top \mathbf{v}))^2 \mathbb{P}(\|\mathbf{x}_i\|_4 \geq \tau_1)} + M_2 \left(\frac{d}{n}\right)^{1/2} \\ & \leq (M_1 R)^{1/4} \frac{\sqrt{dR}}{\tau_1^2} + M_2 \left(\frac{d}{n}\right)^{1/2}. \end{aligned}$$

Therefore  $\|T_{22}\|_2 \leq (M_1 R)^{1/4} \sqrt{dR} / \tau_1^2 + M_2 \sqrt{d/n}$ . For  $T_{23}$ , since  $\mathbb{E}[y_i - b'(\mathbf{x}_i^\top \boldsymbol{\beta}^*) | \mathbf{x}_i] = 0$ ,  $T_{23} = 0$ . Finally we bound  $T_{24}$ . For any  $\mathbf{v} \in \mathbb{R}^d$  such that  $\|\mathbf{v}\|_2 = 1$ ,

$$\begin{aligned} \|T_{24}\|_2 & \leq M \mathbb{E}(\boldsymbol{\beta}^{*\top}(\mathbf{x}_i - \tilde{\mathbf{x}}_i))(\mathbf{v}^\top \tilde{\mathbf{x}}_i) \leq M \mathbb{E}[(\boldsymbol{\beta}^{*\top} \mathbf{x}_i)(\mathbf{v}^\top \mathbf{x}_i)1_{\{\|\mathbf{x}_i\|_4 \geq \tau_1\}}] \\ & \leq M \sqrt{\mathbb{E}(\boldsymbol{\beta}^{*\top} \mathbf{x}_i)^2 (\mathbf{v}^\top \mathbf{x}_i)^2 \mathbb{P}(\|\mathbf{x}_i\|_4 \geq \tau_1)} \leq ML \sqrt{dR} / \tau_1^2. \end{aligned}$$

To summarize here, we have

$$\|T_2\|_2 \leq (M_1 R)^{1/4} \left( \frac{\sqrt{M_1}}{\tau_2^2} + \frac{\sqrt{dR}}{\tau_1^2} \right) + ML \frac{\sqrt{dR}}{\tau_1^2} + M_2 \left( \frac{d}{n} \right)^{1/2}. \quad (25)$$

Bound for  $T_3$ : We apply a similar proof strategy as in the bound for  $T_1$ . Define the following Hermitian dilation matrix:

$$\tilde{\mathbf{X}}_i := b'(\tilde{\mathbf{x}}_i^\top \boldsymbol{\beta}^*) \begin{pmatrix} 0 & \tilde{\mathbf{x}}_i^\top \\ \tilde{\mathbf{x}}_i & \mathbf{0} \end{pmatrix}.$$

First,

$$\|\mathbb{E}\tilde{\mathbf{X}}_i^2\|_{\text{op}} = \max(\mathbb{E}(b'(\tilde{\mathbf{x}}_i^\top \boldsymbol{\beta}^*)\tilde{\mathbf{x}}_i^\top \tilde{\mathbf{x}}_i), \|\mathbb{E}b'(\tilde{\mathbf{x}}_i^\top \boldsymbol{\beta}^*)^2 \tilde{\mathbf{x}}_i \tilde{\mathbf{x}}_i^\top\|_{\text{op}}).$$

Write  $|b'(1)|$  as  $b_1$ . For any  $j \in [d]$ ,

$$\begin{aligned} \mathbb{E}(b'(\tilde{\mathbf{x}}_i^\top \boldsymbol{\beta}^*)^2 \tilde{x}_{ij}^2) & \leq \mathbb{E}[(b_1 + M|\tilde{\mathbf{x}}_i^\top \boldsymbol{\beta}^* - 1|)^2 \tilde{x}_{ij}^2] \leq 2\mathbb{E}[(b_1 + M)^2 + M^2(\tilde{\mathbf{x}}_i^\top \boldsymbol{\beta}^*)^2] \tilde{x}_{ij}^2 \\ & \leq 2M^2 R \|\boldsymbol{\beta}^*\|_2^2 + 2(b_1 + M)^2 \sqrt{R} =: V, \end{aligned}$$

so  $\mathbb{E}[b'(\tilde{\mathbf{x}}_i^\top \boldsymbol{\beta}^*)^2 \tilde{\mathbf{x}}_i^\top \tilde{\mathbf{x}}_i] \leq dV$ . In addition, for any  $\mathbf{v} \in \mathbb{R}^d$  such that  $\|\mathbf{v}\|_2 = 1$ ,

$$\mathbb{E}(b'(\tilde{\mathbf{x}}_i^\top \boldsymbol{\beta}^*)^2 (\mathbf{v}^\top \tilde{\mathbf{x}}_i)^2) \leq \mathbb{E}((b_1 + M|\tilde{\mathbf{x}}_i^\top \boldsymbol{\beta}^* - 1|)^2 (\mathbf{v}^\top \tilde{\mathbf{x}}_i)^2) \leq V.$$

We thus have  $\|\mathbb{E}\tilde{\mathbf{X}}_i^2\|_{\text{op}} \leq dV$ . In addition,  $\|\mathbb{E}\tilde{\mathbf{X}}_i\|_{\text{op}} = \mathbb{E}(b'(\tilde{\mathbf{x}}_i^\top \boldsymbol{\beta}^*)\|\tilde{\mathbf{x}}_i\|_2) \leq \sqrt{\mathbb{E}b'(\tilde{\mathbf{x}}_i^\top \boldsymbol{\beta}^*)^2 \mathbb{E}\|\tilde{\mathbf{x}}_i\|_2^2} \leq \sqrt{d}V$ , which further implies that  $\|\mathbb{E}(\tilde{\mathbf{X}}_i - \mathbb{E}\tilde{\mathbf{X}}_i)^2\|_{\text{op}} \leq (d + \sqrt{d})V$ . Also notice that  $\|\tilde{\mathbf{X}}_i\|_{\text{op}} \leq ((b_1 + M) + M\|\boldsymbol{\beta}^*\|_2 d^{1/4} \tau_1) d^{1/4} \tau_1$ . By the matrix Bernstein's inequality,

$$\mathbb{P}\left(\left\|\frac{1}{n} \sum_{i=1}^n \tilde{\mathbf{X}}_i - \mathbb{E}\tilde{\mathbf{X}}_i\right\|_{\text{op}} \geq t\right) \leq d \exp\left(-c_1 \min\left(\frac{nt^2}{(d + \sqrt{d})V}, \frac{nt}{(b_1 + M + M\|\boldsymbol{\beta}^*\|_2 d^{1/4} \tau_1) d^{1/4} \tau_1}\right)\right).$$

Given that  $\|T_3\|_2 = 2\|n^{-1} \sum_{i=1}^n \tilde{\mathbf{X}}_i - \mathbb{E} \tilde{\mathbf{X}}_i\|_{\text{op}}$ , it thus holds that

$$\mathbb{P}\left(\|T_3\|_2 \geq 2t\right) \leq d \exp\left(-c_1 \min\left(\frac{nt^2}{(d + \sqrt{d})V}, \frac{nt}{(b_1 + M + M\|\boldsymbol{\beta}^*\|_2 d^{1/4} \tau_1) d^{1/4} \tau_1}\right)\right). \quad (26)$$

Finally, choose  $\tau_1, \tau_2 \asymp (n/\log n)^{1/4}$ . Combining (24), (25) and (26) delivers that for some constant  $C_1$  any  $\xi > 1$ ,

$$\mathbb{P}\left\{\|\nabla \tilde{\ell}_n(\boldsymbol{\beta}^*)\|_2 \geq C_1 \xi \left(\frac{d \log n}{n}\right)^{1/2}\right\} \leq n^{1-\xi}. \quad (27)$$

Choose  $t = \xi \log n$  and let  $r$  be larger than the RHS of (22). When  $d/n$  is sufficiently small and  $n$  is sufficiently large, we can obtain that

$$r \geq C_2 \xi \left(\frac{d \log n}{n}\right)^{1/2} =: r_0,$$

where  $C_2$  is a constant. Choose  $r = r_0$ . Then by (22),  $\|\boldsymbol{\Delta}_\eta\|_2 \leq r_0$  and thus  $\tilde{\boldsymbol{\Delta}} = \tilde{\boldsymbol{\Delta}}_\eta$ . Finally, we reach the conclusion that

$$\mathbb{P}\left\{\|\tilde{\boldsymbol{\Delta}}\|_2 \geq C_2 \xi \left(\frac{d \log n}{n}\right)^{1/2}\right\} \leq n^{1-\xi} + 2n^{-\xi} \leq 3n^{1-\xi}.$$

□

*Proof of Corollary 1.* The proof strategy is nearly the same as that for deriving Theorem 1, so we provide a roadmap here and do not dive into great details. For ease of notation, write  $n^{-1} \sum_{i=1}^n \ell^w(\tilde{\mathbf{x}}_i, z_i; \boldsymbol{\beta})$  as  $\tilde{\ell}^w(\boldsymbol{\beta})$  and denote the hessian matrix of  $\tilde{\ell}_n^w(\boldsymbol{\beta})$  by  $\tilde{\mathbf{H}}_n^w(\boldsymbol{\beta})$ . Since  $\tilde{\mathbf{H}}_n^w(\boldsymbol{\beta}) = \nabla^2 \tilde{\ell}_n^w(\boldsymbol{\beta}) = \tilde{\mathbf{H}}_n(\boldsymbol{\beta})$ , we can directly obtain the uniform strong convexity of  $\tilde{\mathbf{H}}_n^w(\boldsymbol{\beta})$  from Lemma 1. In addition,

$$\begin{aligned} \nabla_{\boldsymbol{\beta}} \tilde{\ell}_n^w(\boldsymbol{\beta}^*) &= \frac{1-p}{1-2p} \frac{1}{n} \underbrace{\sum_{i=1}^n (b'(\tilde{\mathbf{x}}_i^\top \boldsymbol{\beta}^*) - z_i) \tilde{\mathbf{x}}_i}_{T_1} - \frac{p}{1-2p} \frac{1}{n} \underbrace{\sum_{i=1}^n (b'(\tilde{\mathbf{x}}_i^\top \boldsymbol{\beta}^*) - (1-z_i)) \tilde{\mathbf{x}}_i}_{T_2} \\ &= \frac{1-p}{1-2p} (T_1 - \mathbb{E}T_1) - \frac{p}{1-2p} (T_2 - \mathbb{E}T_2) + \frac{1-p}{1-2p} \mathbb{E}T_1 - \frac{p}{1-2p} \mathbb{E}T_2 \\ &= \frac{1-p}{1-2p} (T_1 - \mathbb{E}T_1) - \frac{p}{1-2p} (T_2 - \mathbb{E}T_2) + \mathbb{E}(b'(\tilde{\mathbf{x}}_i^\top \boldsymbol{\beta}^*) - y_i) \tilde{\mathbf{x}}_i. \end{aligned}$$

Since  $|b'(\tilde{\mathbf{x}}_i^\top \boldsymbol{\beta}^*) - z_i| \leq 1$  and  $|b'(\tilde{\mathbf{x}}_i^\top \boldsymbol{\beta}^*) - (1-z_i)| \leq 1$ , following the bound for  $T_1$  in Theorem 1, we will obtain

$$\mathbb{P}\left\{\left\|\frac{1-p}{1-2p} (T_1 - \mathbb{E}T_1) - \frac{p}{1-2p} (T_2 - \mathbb{E}T_2)\right\|_2 \geq c_1 \xi \left(\frac{d \log n}{n}\right)^{1/2}\right\} \leq n^{1-\xi},$$

where  $c_1 > 0$  depends on  $R$  and  $p$  and  $\xi > 1$ . In addition, following the bound for  $T_{23}$  and  $T_{24}$  in Theorem 1, we shall obtain

$$\|\mathbb{E}(b'(\tilde{\mathbf{x}}_i^\top \boldsymbol{\beta}^*) - y_i) \tilde{\mathbf{x}}_i\|_2 \leq M_2 L \frac{\sqrt{dR}}{\tau_1^2} \leq c_2 M_2 \left(\frac{dR \log n}{n}\right)^{1/2}.$$

where  $c_2 > 0$  is a constant. Therefore, for some constant  $c_3$  depending on  $R, p, M_2, R$ , we have

$$\mathbb{P}\left\{\|\nabla_{\boldsymbol{\beta}} \tilde{\ell}_n^w(\boldsymbol{\beta}^*)\|_2 \geq c_3 \xi \left(\frac{d \log n}{n}\right)^{1/2}\right\} \leq n^{1-\xi}.$$

Combining this with the uniform strong convexity of  $\tilde{\mathbf{H}}_n^w(\boldsymbol{\beta})$  delivers the final conclusion. □

*Proof of Lemma 2.* According to (3),  $[\nabla_{\beta} \tilde{\ell}(\beta^*)]_j = (b'(\tilde{\mathbf{x}}_i^\top \beta^*) - \tilde{z}_i) \tilde{x}_{ij}$ . Then we have

$$\begin{aligned} \left| \frac{1}{n} \sum_{i=1}^n (b'(\tilde{\mathbf{x}}_i^\top \beta^*) - \tilde{z}_i) \tilde{x}_{ij} \right| &\leq \underbrace{\left| \frac{1}{n} \sum_{i=1}^n b'(\tilde{\mathbf{x}}_i^\top \beta^*) \tilde{x}_{ij} - \mathbb{E} b'(\tilde{\mathbf{x}}_i^\top \beta^*) \tilde{x}_{ij} \right|}_{T_1} + \underbrace{\left| \mathbb{E} (b'(\tilde{\mathbf{x}}_i^\top \beta^*) - \tilde{z}_i) \tilde{x}_{ij} \right|}_{T_2} \\ &\quad + \underbrace{\left| \frac{1}{n} \sum_{i=1}^n \tilde{z}_i \tilde{x}_{ij} - \mathbb{E} \tilde{z}_i \tilde{x}_{ij} \right|}_{T_3}. \end{aligned} \quad (28)$$

We start with the upper bound of  $T_1$ . By the Mean Value Theorem, for any  $i \in [n]$ , there exists  $\xi_i$  between 1 and  $\tilde{\mathbf{x}}_i^\top \beta^*$  such that  $b'(\tilde{\mathbf{x}}_i^\top \beta^*) = b'(1) + b''(\xi_i)(\tilde{\mathbf{x}}_i^\top \beta^* - 1)$ . Therefore we have

$$\begin{aligned} T_1 &\leq \left| \frac{1}{n} \sum_{i=1}^n b'(1) \tilde{x}_{ij} - \mathbb{E} (b'(1) \tilde{x}_{ij}) \right| + \left| \frac{1}{n} \sum_{i=1}^n b''(\xi_i) \tilde{x}_{ij} (\tilde{\mathbf{x}}_i^\top \beta^* - 1) - \mathbb{E} (b''(\xi_i) \tilde{x}_{ij} (\tilde{\mathbf{x}}_i^\top \beta^* - 1)) \right| \\ &\leq \left| \frac{1}{n} \sum_{i=1}^n b'(1) \tilde{x}_{ij} - \mathbb{E} (b'(1) \tilde{x}_{ij}) \right| + \sum_{k=1}^d |\beta_k^*| \left| \frac{1}{n} \sum_{i=1}^n b''(\xi_i) \tilde{x}_{ij} \tilde{x}_{ik} - \mathbb{E} (b''(\xi_i) \tilde{x}_{ij} \tilde{x}_{ik}) \right| \\ &\quad + \left| \frac{1}{n} \sum_{i=1}^n b''(\xi_i) \tilde{x}_{ij} - \mathbb{E} (b''(\xi_i) \tilde{x}_{ij}) \right|. \end{aligned}$$

Since  $\text{var}(\tilde{x}_{ij}) \leq \sqrt{R}$  and  $|\tilde{x}_{ij}| \leq \tau_1$ , an application of Bernstein's inequality (Theorem 2.10 in Boucheron et al. (2013)) yields that

$$\mathbb{P} \left[ \left| \frac{1}{n} \sum_{i=1}^n b'(1) \tilde{x}_{ij} - \mathbb{E} (b'(1) \tilde{x}_{ij}) \right| \geq |b'(1)| \left\{ \left( \frac{\sqrt{R} 2t}{n} \right)^{1/2} + \frac{c_1 \tau_1 t}{n} \right\} \right] \leq 2 \exp(-t),$$

where  $c_1 > 0$  is some universal constant. In addition,  $b''(\xi_i) \tilde{x}_{ij} \tilde{x}_{ik} \leq M \tau_1^2$  and  $\text{var}(b''(\xi_i) \tilde{x}_{ij} \tilde{x}_{ik}) \leq \mathbb{E} (b''(\xi_i) \tilde{x}_{ij} \tilde{x}_{ik})^2 \leq M^2 R$ . Again by Bernstein's inequality,

$$\mathbb{P} \left\{ \left| \frac{1}{n} \sum_{i=1}^n b''(\xi_i) \tilde{x}_{ij} \tilde{x}_{ik} - \mathbb{E} (b''(\xi_i) \tilde{x}_{ij} \tilde{x}_{ik}) \right| \geq \left( \frac{2M^2 R t}{n} \right)^{1/2} + \frac{c_1 M \tau_1^2 t}{n} \right\} \leq 2 \exp(-t).$$

Similarly,

$$\mathbb{P} \left\{ \left| \frac{1}{n} \sum_{i=1}^n b''(\xi_i) \tilde{x}_{ij} - \mathbb{E} (b''(\xi_i) \tilde{x}_{ij}) \right| \geq \left( \frac{M^2 \sqrt{R} t}{n} \right)^{1/2} + \frac{M \tau_1 t}{n} \right\} \leq 2 \exp(-t).$$

Combining the above three inequalities delivers that

$$\begin{aligned} \mathbb{P} \left[ T_1 \geq |b'(1)| \left\{ \left( \frac{\sqrt{R} 2t}{n} \right)^{1/2} + \frac{c_1 \tau_1 t}{n} \right\} + \left( \frac{2M^2 R t}{n} \right)^{1/2} + \frac{c_1 M \tau_1^2 t}{n} + \left( \frac{M^2 \sqrt{R} t}{n} \right)^{1/2} + \frac{M \tau_1 t}{n} \right] \\ \leq 6 \exp(-t). \end{aligned} \quad (29)$$

Now we bound  $T_2$ .

$$\begin{aligned} T_2 &= \mathbb{E} [(z_i - \tilde{z}_i) \tilde{x}_{ij}] + \mathbb{E} \epsilon_i \tilde{x}_{ij} + \mathbb{E} [(b'(\mathbf{x}_i^\top \beta^*) - b'(\tilde{\mathbf{x}}_i^\top \beta^*)) \tilde{x}_{ij}] \\ &\leq \mathbb{E} [|z_i \tilde{x}_{ij}| \mathbf{1}_{\{|z_i| \geq \tau_2\}}] + \mathbb{E} (\epsilon_i x_{ij}) + \mathbb{E} \epsilon_i (x_{ij} - \tilde{x}_{ij}) + M \sum_{k=1}^d |\beta_k^*| \mathbb{E} |\tilde{x}_{ik} (\tilde{x}_{ij} - x_{ij})| \\ &\leq (M_1 R)^{1/4} \frac{\sqrt{M_1}}{\tau_2^2} + \frac{M_3}{\sqrt{n}} + \frac{(M_1 R)^{1/4}}{\tau_1^2} + M M_2 \frac{\sqrt{R}}{\tau_1^2}. \end{aligned} \quad (30)$$

Finally we bound  $T_3$ . Note that  $|\tilde{z}_i \tilde{x}_{ij}| \leq \tau_1 \tau_2$ ,  $\text{var}(\tilde{x}_{ij} \tilde{z}_i) \leq \mathbb{E} |\tilde{z}_i \tilde{x}_{ij}|^2 \leq \sqrt{M_1 R}$ . According to the Bernstein's inequality,

$$\mathbb{P} \left\{ |T_3| \geq \left( \frac{2t \sqrt{M_1 R}}{n} \right)^{1/2} + \frac{c_1 \tau_1 \tau_2 t}{n} \right\} \leq 2 \exp(-t). \quad (31)$$

Choose  $\tau_1, \tau_2 \asymp (n/\log d)^{1/4}$ . Combining (29), (30) and (31) delivers that for some constant  $C_1 > 0$  that depends on  $M, R, \{M_i\}_{i=1}^3, b'(1)$  and any  $\xi > 1$ ,

$$\mathbb{P}\left\{|\nabla_{\beta} \tilde{\ell}(\beta^*)|_j \geq C_1 \xi \left(\frac{\log d}{n}\right)^{1/2}\right\} \leq 2d^{-\xi}.$$

Then by the union bound for all  $j \in [d]$ , it holds that

$$\mathbb{P}\left\{\max_{j \in [d]} |\nabla_{\beta} \tilde{\ell}(\beta^*)|_j \geq C_1 \xi \left(\frac{\log d}{n}\right)^{1/2}\right\} \leq 2d^{1-\xi}.$$

□

*Proof of Lemma 3.* The proof strategy is quite similar to that for Lemma 1, except that we need to take advantage of the restricted cone  $\mathcal{C}(\mathcal{S})$  that  $\Delta$  lies in. First of all, for any  $1 \leq j, k \leq d$ ,

$$|\mathbb{E}(\tilde{x}_{ij}\tilde{x}_{ik} - x_{ij}x_{ik})| \leq \sqrt{\mathbb{E}(x_{ij}x_{ik})^2(\mathbb{P}(|x_{ij}| \geq \tau_1) + \mathbb{P}(|x_{ik}| \geq \tau_1))} \leq \frac{\sqrt{2}R}{\tau_1^2}.$$

We thus have

$$\|\mathbb{E}[\mathbf{x}_i \mathbf{x}_i^\top - \tilde{\mathbf{x}}_i \tilde{\mathbf{x}}_i^\top]\|_{\max} \leq \frac{\sqrt{2}R}{\tau_1^2} \leq CR \left(\frac{2 \log d}{n}\right)^{1/2}, \quad (32)$$

where  $C > 0$  is some constant. Again, define a contraction function

$$\phi(x; \theta) = x^2 \mathbf{1}_{\{|x| \leq \theta\}} + (x - 2\theta)^2 \mathbf{1}_{\{\theta < x \leq 2\theta\}} + (x + 2\theta)^2 \mathbf{1}_{\{-2\theta \leq x < -\theta\}}.$$

Given any  $\Delta \in \mathcal{B}_2(\mathbf{0}, r) \cap \mathcal{C}(\mathcal{S})$ , by the Taylor expansion, we can find  $v \in (0, 1)$  such that

$$\begin{aligned} \delta \tilde{\ell}_n(\beta^* + \Delta; \beta^*) &= \tilde{\ell}_n(\beta^* + \Delta) - \tilde{\ell}_n(\beta^*) - \nabla \tilde{\ell}_n(\beta^*)^\top \Delta = \frac{1}{2} \Delta^\top \tilde{\mathbf{H}}_n(\beta^* + v\Delta) \Delta \\ &= \frac{1}{2n} \sum_{i=1}^n b''(\tilde{\mathbf{x}}_i^\top(\beta^* + v\Delta)) (\Delta^\top \tilde{\mathbf{x}}_i)^2 \geq \frac{1}{2n} \sum_{i=1}^n b''(\tilde{\mathbf{x}}_i^\top(\beta^* + v\Delta)) \phi(\Delta^\top \tilde{\mathbf{x}}_i; \alpha_1 r) \mathbf{1}_{\{|\beta^{*\top} \tilde{\mathbf{x}}_i| \leq \alpha_2\}} \\ &\geq \frac{m(\omega)}{2n} \sum_{i=1}^n \phi(\Delta^\top \tilde{\mathbf{x}}_i; \alpha_1 r) \mathbf{1}_{\{|\beta^{*\top} \tilde{\mathbf{x}}_i| \leq \alpha_2\}}, \end{aligned} \quad (33)$$

where we choose  $\omega = \alpha_1 + \alpha_2 > \alpha_1 r + \alpha_2$  so that the last inequality holds by Condition (1). For ease of notation, let  $\mathcal{A}_i := \{|\Delta^\top \tilde{\mathbf{x}}_i| \leq \alpha_1 r\}$  and  $\mathcal{B}_i := \{|\beta^{*\top} \tilde{\mathbf{x}}_i| \leq \alpha_2\}$ . We have

$$\begin{aligned} \mathbb{E}[\phi(\Delta^\top \tilde{\mathbf{x}}_i; \alpha_1 r) \mathbf{1}_{\mathcal{B}_i}] &\geq \mathbb{E}[(\Delta^\top \tilde{\mathbf{x}}_i)^2 \mathbf{1}_{\mathcal{A}_i \cap \mathcal{B}_i}] \\ &\geq \Delta^\top \mathbb{E}[\mathbf{x}_i \mathbf{x}_i^\top \mathbf{1}_{\mathcal{A}_i \cap \mathcal{B}_i}] \Delta - \Delta^\top \mathbb{E}[(\mathbf{x}_i \mathbf{x}_i^\top - \tilde{\mathbf{x}}_i \tilde{\mathbf{x}}_i^\top) \mathbf{1}_{\mathcal{A}_i \cap \mathcal{B}_i}] \Delta \\ &\geq \Delta^\top \mathbb{E}[\mathbf{x}_i \mathbf{x}_i^\top \mathbf{1}_{\mathcal{A}_i \cap \mathcal{B}_i}] \Delta - \Delta^\top \mathbb{E}[\mathbf{x}_i \mathbf{x}_i^\top - \tilde{\mathbf{x}}_i \tilde{\mathbf{x}}_i^\top] \Delta \\ &\geq \Delta^\top \mathbb{E}[\mathbf{x}_i \mathbf{x}_i^\top] \Delta - \Delta^\top \mathbb{E}[\mathbf{x}_i \mathbf{x}_i^\top \mathbf{1}_{\mathcal{A}_i^c \cup \mathcal{B}_i^c}] \Delta - \Delta^\top \mathbb{E}[\mathbf{x}_i \mathbf{x}_i^\top - \tilde{\mathbf{x}}_i \tilde{\mathbf{x}}_i^\top] \Delta \\ &\geq \kappa_0 \|\Delta\|_2^2 - \sqrt{\mathbb{E}(\Delta^\top \mathbf{x}_i)^4 (\mathbb{P}(\mathcal{A}_i^c) + \mathbb{P}(\mathcal{B}_i^c))} - \Delta^\top \mathbb{E}[\mathbf{x}_i \mathbf{x}_i^\top - \tilde{\mathbf{x}}_i \tilde{\mathbf{x}}_i^\top] \Delta \\ &\geq \kappa_0 \|\Delta\|_2^2 - \sqrt{R(\mathbb{P}(\mathcal{A}_i^c) + \mathbb{P}(\mathcal{B}_i^c))} \|\Delta\|_2^2 - \|\mathbb{E}[\mathbf{x}_i \mathbf{x}_i^\top - \tilde{\mathbf{x}}_i \tilde{\mathbf{x}}_i^\top]\|_{\max} \|\Delta\|_1^2 \end{aligned}$$

By the Markov Inequality and (32),

$$\begin{aligned} \mathbb{P}(\mathcal{A}_i^c) &\leq \frac{\mathbb{E}(\Delta^\top \tilde{\mathbf{x}}_i)^2}{\alpha_1^2 r^2} \leq \frac{\mathbb{E}(\Delta^\top \mathbf{x}_i)^2 + \Delta^\top \mathbb{E}(\tilde{\mathbf{x}}_i \tilde{\mathbf{x}}_i^\top - \mathbf{x}_i \mathbf{x}_i^\top) \Delta}{\alpha_1^2 r^2} \\ &\leq \frac{\sqrt{R} \|\Delta\|_2^2 + CRs \|\Delta\|_2^2 \sqrt{2 \log d/n}}{\alpha_1^2 r^2} \leq \frac{\sqrt{R} + CRs \sqrt{\log d/n}}{\alpha_1^2} \end{aligned}$$

and

$$\begin{aligned} \mathbb{P}(\mathcal{B}_i^c) &\leq \frac{\mathbb{E}(\boldsymbol{\beta}^{*\top} \tilde{\mathbf{x}}_i)^2}{\alpha_2^2} \leq \frac{\mathbb{E}(\boldsymbol{\beta}^{*\top} \mathbf{x}_i)^2 + \boldsymbol{\beta}^{*\top} \mathbb{E}(\tilde{\mathbf{x}}_i \tilde{\mathbf{x}}_i^\top - \mathbf{x}_i \mathbf{x}_i^\top) \boldsymbol{\beta}^*}{\alpha_2^2} \\ &\leq \frac{\sqrt{R} \|\boldsymbol{\beta}^*\|_2^2 + CRs \|\boldsymbol{\beta}^*\|_2^2 \sqrt{2 \log d/n}}{\alpha_2^2} \leq \frac{\sqrt{R} L^2 + CRL^2 s \sqrt{2 \log d/n}}{\alpha_2^2}. \end{aligned}$$

Overall, as long as  $\alpha_1, \alpha_2$  are sufficiently large and  $s\sqrt{\log d/n}$  is not large,

$$\mathbb{E}[\phi(\boldsymbol{\Delta}^\top \tilde{\mathbf{x}}_i; \alpha_1 r) 1_{\mathcal{B}_i}] \geq \frac{\kappa_0}{2} \|\boldsymbol{\Delta}\|_2^2. \quad (34)$$

For notational convenience, define  $Z_i := \phi(\boldsymbol{\Delta}^\top \tilde{\mathbf{x}}_i; \alpha_1 r) 1_{\mathcal{B}_i} = \phi(\boldsymbol{\Delta}^\top \tilde{\mathbf{x}}_i 1_{\mathcal{B}_i}; \alpha_1 r)$  and  $\Gamma_r := \sup_{\|\boldsymbol{\Delta}\|_2 \leq r, \boldsymbol{\Delta} \in \mathcal{C}(\mathcal{S})} |n^{-1} \sum_{i=1}^n Z_i - \mathbb{E} Z_i|$ . Then an application of Massart's inequality (Massart (2000)) delivers that

$$\mathbb{P}\left\{|\Gamma_r - \mathbb{E} \Gamma_r| \geq \alpha_1^2 r^2 \left(\frac{t}{n}\right)^{1/2}\right\} \leq 2 \exp(-\frac{t}{8}). \quad (35)$$

The remaining job is to derive the order of  $\mathbb{E} \Gamma_r$ . By the symmetrization argument and Ledoux-Talagrand contraction inequality, for a sequence of i.i.d. Rademacher variables  $\{\gamma_i\}_{i=1}^n$ ,

$$\begin{aligned} \mathbb{E} \Gamma_r &\leq 2 \mathbb{E} \sup_{\|\boldsymbol{\Delta}\|_2 \leq r, \boldsymbol{\Delta} \in \mathcal{C}(\mathcal{S})} \left| \frac{1}{n} \sum_{i=1}^n \gamma_i Z_i \right| \leq 8 \alpha_1 r \mathbb{E} \sup_{\|\boldsymbol{\Delta}\|_2 \leq r, \boldsymbol{\Delta} \in \mathcal{C}(\mathcal{S})} \left| \left\langle \frac{1}{n} \sum_{i=1}^n \gamma_i \tilde{\mathbf{x}}_i 1_{\{|\boldsymbol{\beta}^{*\top} \tilde{\mathbf{x}}_i| \leq \alpha_2\}}, \boldsymbol{\Delta} \right\rangle \right| \\ &\leq 8 \alpha_1 \sqrt{s} r^2 \mathbb{E} \left\| \frac{1}{n} \sum_{i=1}^n \gamma_i \tilde{\mathbf{x}}_i 1_{\{|\boldsymbol{\beta}^{*\top} \tilde{\mathbf{x}}_i| \leq \alpha_2\}} \right\|_{\max}. \end{aligned}$$

For any  $1 \leq j \leq d$ , by Bernstein inequality,

$$\mathbb{P}\left\{ \left| \frac{1}{n} \sum_{i=1}^n \gamma_i \tilde{x}_{ij} 1_{\{|\boldsymbol{\beta}^{*\top} \tilde{\mathbf{x}}_i| \leq \alpha_2\}} \right| \geq \left( \frac{2\sqrt{R}t}{n} \right)^{1/2} + \frac{C_1 \tau_1 t}{n} \right\} \leq 2 \exp(-t),$$

where  $C_1$  is some constant. By the union bound, we can deduce that for some constant  $C_2$ ,

$$\mathbb{P}\left\{ \left\| \frac{1}{n} \sum_{i=1}^n \gamma_i \tilde{\mathbf{x}}_i 1_{\{|\boldsymbol{\beta}^{*\top} \tilde{\mathbf{x}}_i| \leq \alpha_2\}} \right\|_{\max} \geq C_2 \left( \frac{t \log d}{n} \right)^{1/2} \right\} \leq 2d^{1-t},$$

which further implies that

$$\mathbb{E} \Gamma_r \leq 8 \alpha_1 \sqrt{s} r^2 \mathbb{E} \left\| \frac{1}{n} \sum_{i=1}^n \gamma_i \tilde{\mathbf{x}}_i 1_{\{|\boldsymbol{\beta}^{*\top} \tilde{\mathbf{x}}_i| \leq \alpha_2\}} \right\|_{\max} \leq 8 C_3 \alpha_1 r^2 \left( \frac{s \log d}{n} \right)^{1/2}.$$

for some constant  $C_3$ . Combining the above inequality with (33), (34) and (35) yields that for any  $t > 0$ , with probability at least  $1 - 2 \exp(-t)$ ,

$$\delta \tilde{\ell}_n(\boldsymbol{\beta}; \boldsymbol{\beta}^*) \geq \frac{m \kappa_0}{4} \|\boldsymbol{\Delta}\|_2^2 - \alpha_1^2 r^2 \left( \frac{8t}{n} \right)^{1/2} - 8 C_3 \alpha_1 r^2 \left( \frac{s \log d}{n} \right)^{1/2}.$$

□

*Proof of Theorem 2.* According to Lemma 1 in Negahban et al. (2012), as long as  $\lambda \geq 2 \|\nabla \tilde{\ell}_n(\boldsymbol{\beta})\|_{\max}$ ,  $\tilde{\boldsymbol{\Delta}} \in \mathcal{C}(\mathcal{S})$ . We construct an intermediate estimator  $\tilde{\boldsymbol{\beta}}_\eta$  between  $\tilde{\boldsymbol{\beta}}$  and  $\boldsymbol{\beta}^*$ :

$$\tilde{\boldsymbol{\beta}}_\eta = \boldsymbol{\beta}^* + \eta(\tilde{\boldsymbol{\beta}} - \boldsymbol{\beta}^*),$$



where  $\eta = 1$  if  $\|\tilde{\boldsymbol{\beta}} - \boldsymbol{\beta}^*\|_2 \leq r$  and  $\eta = r/\|\tilde{\boldsymbol{\beta}} - \boldsymbol{\beta}^*\|_2$  if  $\|\tilde{\boldsymbol{\beta}} - \boldsymbol{\beta}^*\|_2 > r$ . Choose  $\lambda = 2C\xi\sqrt{\log d/n}$ , where  $C$  and  $\xi$  are the same as in Lemma 2. By Lemmas 2 and 3, it holds with probability at least  $1 - 2\exp(-t)$  that

$$\begin{aligned}
 \kappa\|\tilde{\boldsymbol{\Delta}}_\eta\|_2^2 - C_0r^2\left\{\left(\frac{t}{n}\right)^{1/2} + \left(\frac{s\log d}{n}\right)^{1/2}\right\} &\leq \delta\tilde{\ell}_n(\tilde{\boldsymbol{\beta}}_\eta; \boldsymbol{\beta}^*) \\
 &= \tilde{\ell}_n(\tilde{\boldsymbol{\beta}}_\eta) - \tilde{\ell}_n(\boldsymbol{\beta}^*) - \nabla\tilde{\ell}_n(\boldsymbol{\beta}^*)^\top\tilde{\boldsymbol{\Delta}}_\eta \\
 &\leq \lambda\|\tilde{\boldsymbol{\Delta}}_\eta\|_1 + \|\nabla\tilde{\ell}_n(\boldsymbol{\beta}^*)\|_{\max}\|\tilde{\boldsymbol{\Delta}}_\eta\|_1 \\
 &\leq (\lambda + \|\nabla\tilde{\ell}_n(\boldsymbol{\beta}^*)\|_{\max})\|\tilde{\boldsymbol{\Delta}}_\eta\|_1 \\
 &\leq 4(\lambda + \|\nabla\tilde{\ell}_n(\boldsymbol{\beta}^*)\|_{\max})\|\tilde{\boldsymbol{\Delta}}_\eta\|_S \\
 &\leq 4\sqrt{s}(\lambda + \|\nabla\tilde{\ell}_n(\boldsymbol{\beta}^*)\|_{\max})\|\tilde{\boldsymbol{\Delta}}_\eta\|_2.
 \end{aligned} \tag{36}$$

Some algebra delivers that

$$\begin{aligned}
 \|\tilde{\boldsymbol{\Delta}}_\eta\|_2 &\leq \frac{4\sqrt{s}(\lambda + \|\nabla\tilde{\ell}_n(\boldsymbol{\beta}^*)\|_{\max})}{\kappa} + r\left[\frac{C_0}{\kappa}\left\{\left(\frac{t}{n}\right)^{1/2} + \left(\frac{s\log d}{n}\right)^{1/2}\right\}\right]^{1/2} \\
 &= \frac{4\sqrt{s}\|\nabla\tilde{\ell}_n(\boldsymbol{\beta}^*)\|_{\max}}{\kappa} + \frac{8C\xi}{\kappa}\left(\frac{s\log d}{n}\right)^{1/2} + r\left[\frac{C_0}{\kappa}\left\{\left(\frac{t}{n}\right)^{1/2} + \left(\frac{s\log d}{n}\right)^{1/2}\right\}\right]^{1/2}.
 \end{aligned} \tag{37}$$

Choose  $t = \xi \log d$  above. Let  $r$  be greater than the RHS of the inequality above. For sufficiently small  $s \log d/n$ , we have  $r \geq 5\sqrt{s}\|\nabla\tilde{\ell}_n(\boldsymbol{\beta}^*)\|_{\max}/\kappa$ . Define  $r_0 := 5\sqrt{s}\|\nabla\tilde{\ell}_n(\boldsymbol{\beta}^*)\|_{\max}/\kappa$  and choose  $r = r_0$ . Therefore,  $\|\tilde{\boldsymbol{\Delta}}_\eta\|_2 \leq r$  and  $\tilde{\boldsymbol{\Delta}}_\eta = \tilde{\boldsymbol{\Delta}}$ . By Lemma 2, we reach the conclusion.  $\square$
